# Supplementary material for: Preparation of an innovative series of respiratory nano-filters using polystyrene fibrous films containing KCC-1 dendrimer and ZnO nanostructures for environmental assessment of SO2, NO2 and CO2
Source: Royal Society of Chemistry journal article supplement (doi:10.1039/d4ra00176a), 2024-01-01
Supplement: d4ra00176a1.pdf [file d4ra00176a1.pdf]

## Supporting Information

### Preparation of innovative series of respiratory nano-filters using polystyrene fibrous film containing KCC-1 dendrimer and ZnO nanostructures for environmental assessment of SO<sub>2</sub>, NO<sub>2</sub> and CO<sub>2</sub>

Farzaneh Edrisi <sup>a</sup>, Mehdi Mahmoudian <sup>a,b\*</sup>, Nasrin Shadjou <sup>a,b\*\*</sup>

Department of Nanotechnology, College of Science, Urmia University, Urmia, Iran.  
Nanotechnology Research Center, Urmia University, Urmia, Iran.

Corresponding Authors

E-mail address:

(\*) [m.mahmoudian@urmia.ac.ir](mailto:m.mahmoudian@urmia.ac.ir)

(\*\*) [n.shadjou@urmia.ac.ir](mailto:n.shadjou@urmia.ac.ir)

Tel: +98(44) 32752741.

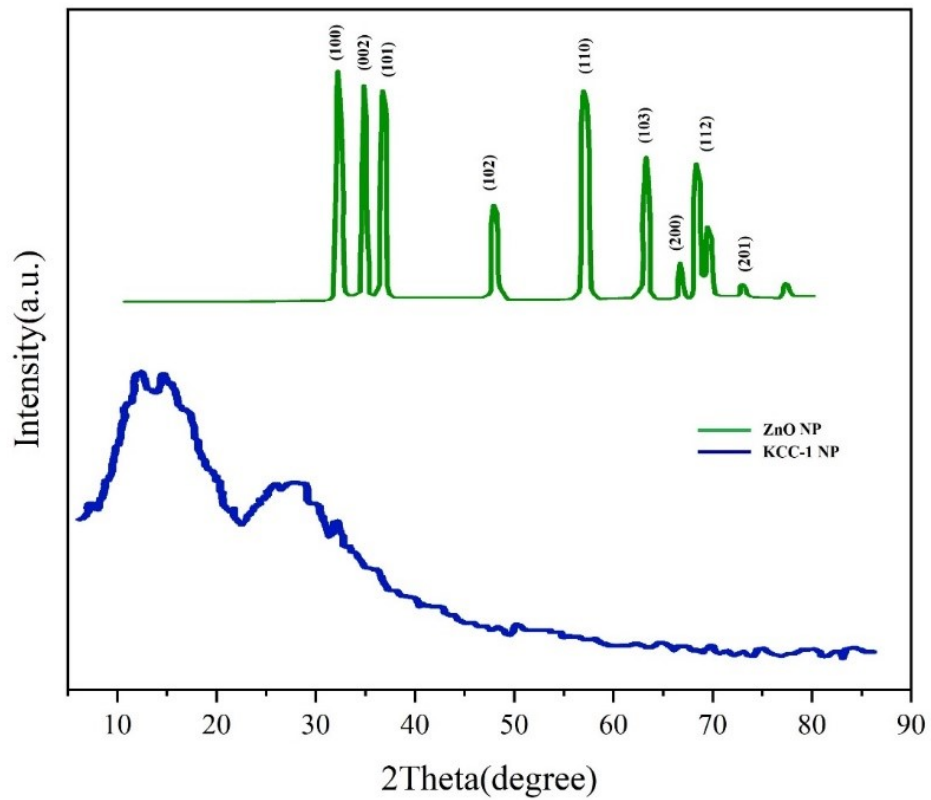

**Figure S1.** XRD patterns of KCC-1 NP and ZnO NP.

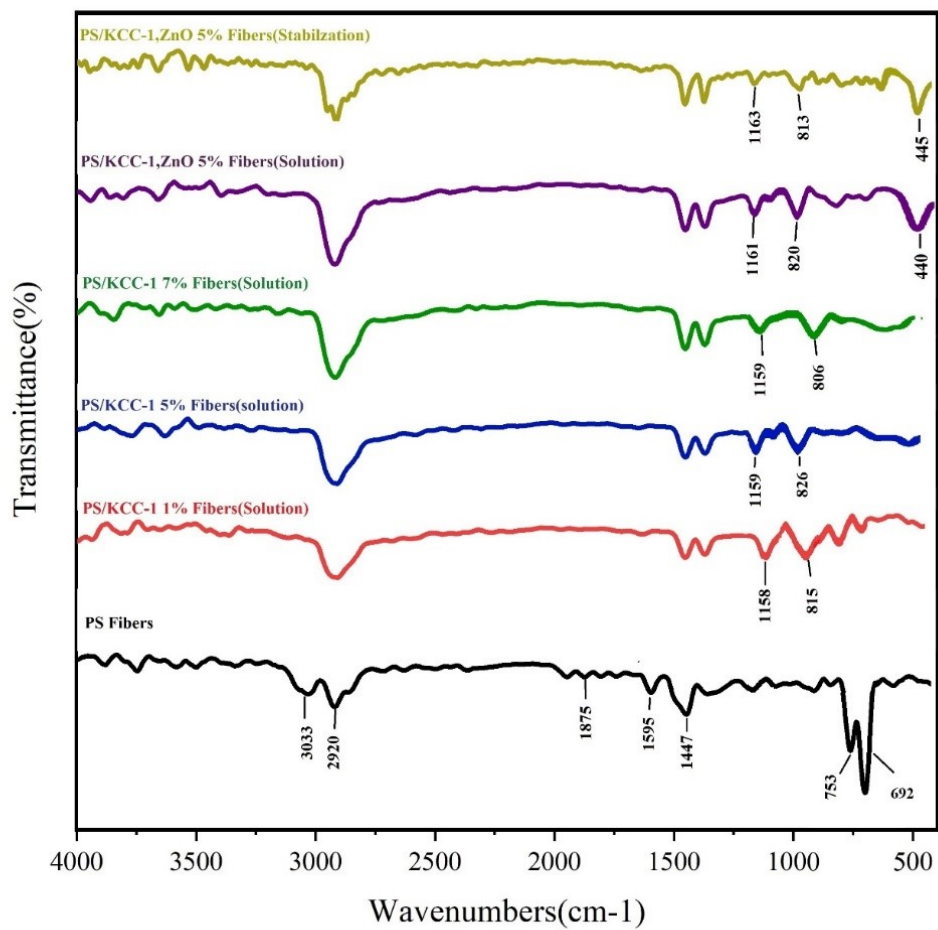

**Figure S2.** FT-IR spectra of PS fibers and PS-nanocomposite fibers.

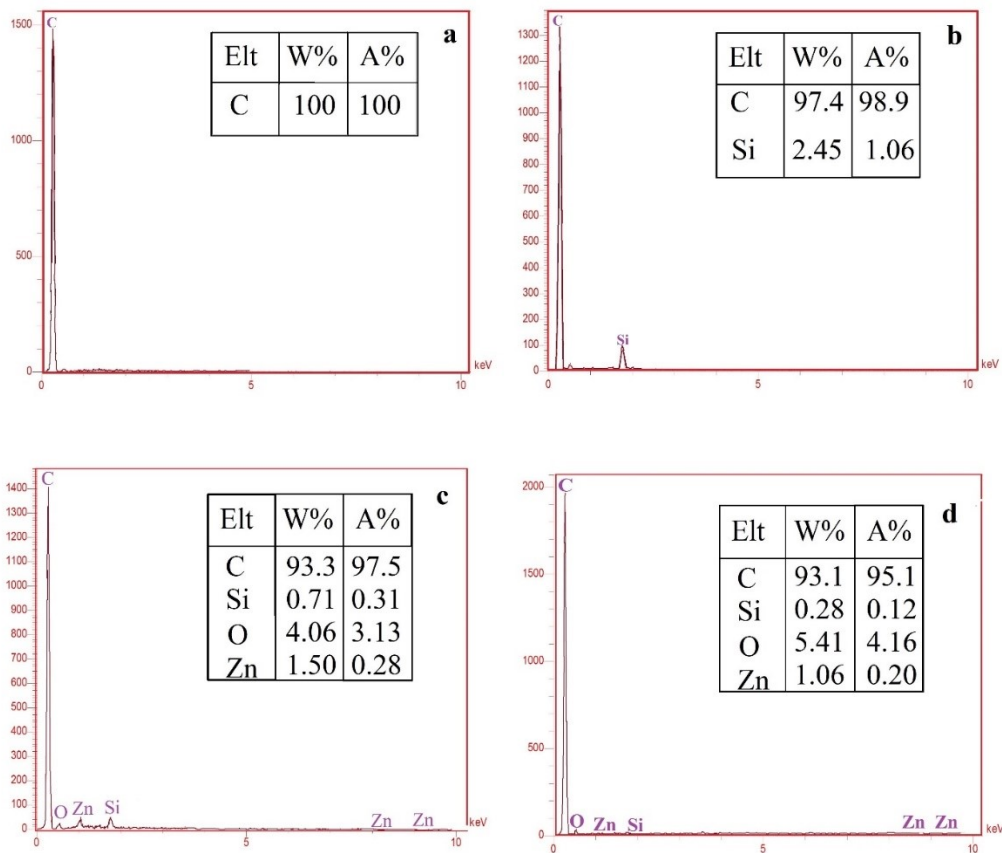

**Figure S3.** EDX spectrum of (a) PS fibers, (b) PSLKCC-1 7% fibers solution, (c) PS/KCC-1, ZnO 5% fibers solution (d) PS/KCC-1, ZnO 5% fibers stabilize.

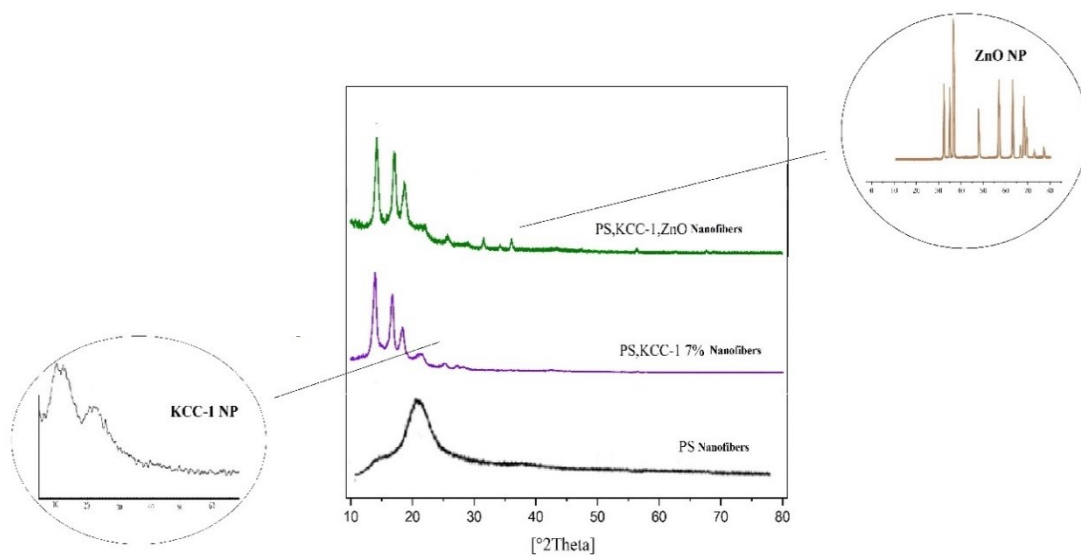

**Figure S4.** XRD patterns of PS fibers and PS- nanocomposite fibers.

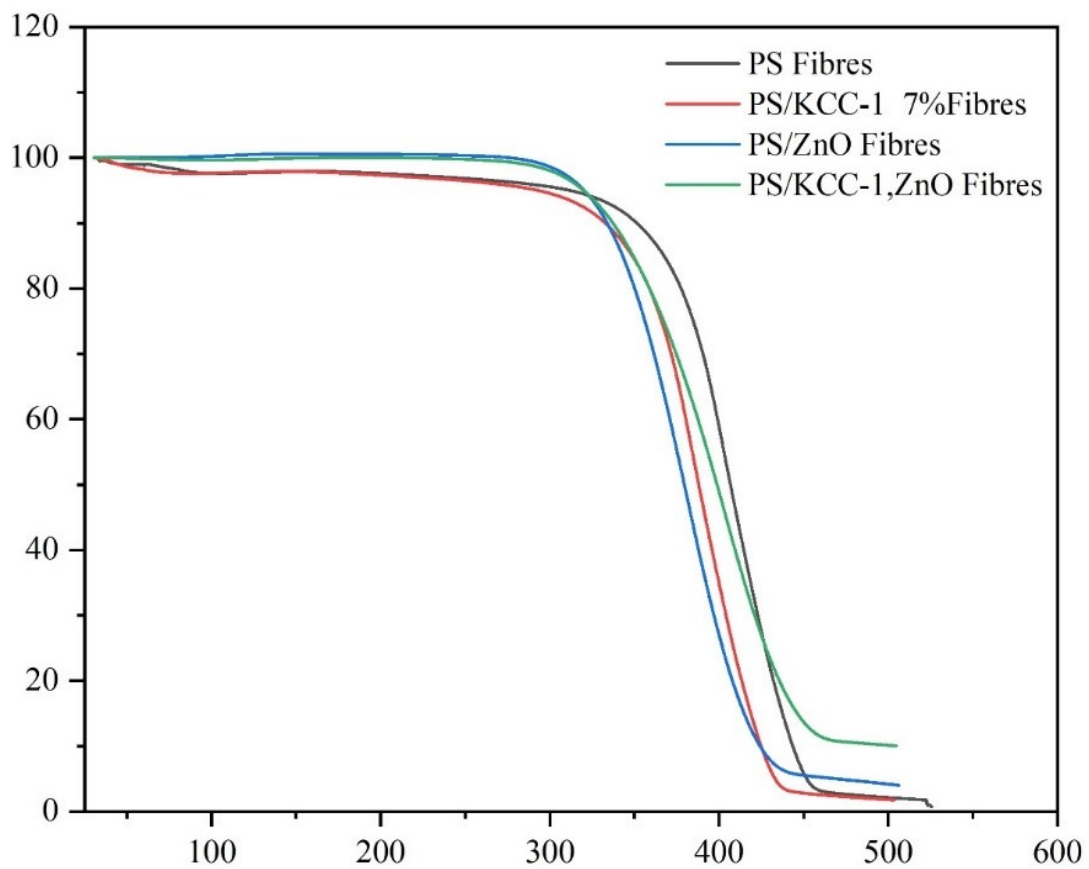

**Figure S5.** TGA curves of PS fibers and PS-nanocomposite fibers.
